# Supplementary material
Source: PubMed Central journal article supplement (PMC9618021)
Supplement: NIHMS1837059-supplement-Table_A.pdf [file NIHMS1837059-supplement-Table_A.pdf]

**Table A.**

**USPSTF Eligibility Criteria for LDCT Screening**

High-risk individuals defined as individuals aged 50 to 80 years who have a 20 pack-year smoking history or have quit within the last 15 years.

| <b>LDCT Screen Eligibility</b> | <b>Total<br/>(BLCS 2013-2021)<br/>n = 1,216</b> | <b>Screened<br/>(BLCS 2013-2021)<br/>n = 114</b> | <b>Unscreened<br/>(BLCS 2013-2021)<br/>n = 1,102</b> |
|--------------------------------|-------------------------------------------------|--------------------------------------------------|------------------------------------------------------|
| Eligible                       | 631                                             | 65                                               | 566                                                  |
| Not Eligible                   | 441                                             | 7                                                | 434                                                  |
| Cannot Be Determined*          | 144                                             | 42                                               | 102                                                  |

\*due to missing data on smoking pack-years or years since quitting
